# Supplementary material
Source: Springer Nature journal article supplement (https://www.springermedizin.de/resource/supplementary/12946_2011_147_MOESM5_ESM.pdf/9555262)

## Differentially expressed genes regulating angiogenesis

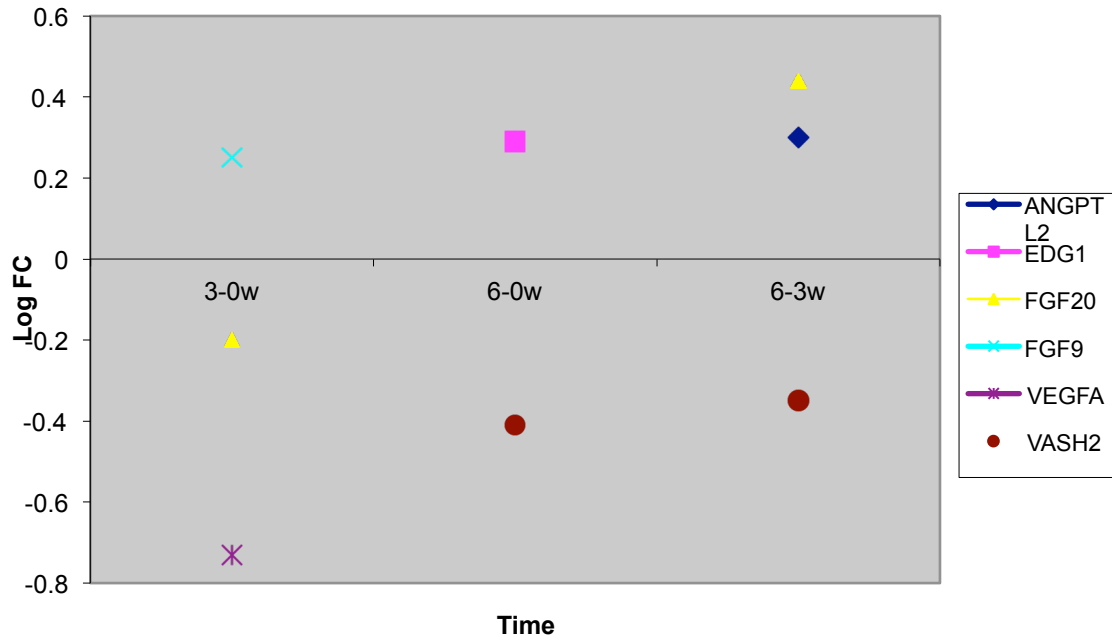

Supplement: MOESM5 [file 9555262]
